# Supplementary material for: Limited evidence on the effectiveness of interventions to reduce livestock predation by large carnivores
Source: PubMed Central journal article supplement (PMC5437004; doi:10.1038/s41598-017-02323-w), 2017-05-18
Supplement: 41598_2017_2323_MOESM1_ESM.pdf [file 41598_2017_2323_MOESM1_ESM.pdf]

1 **Limited evidence on the effectiveness of interventions to reduce livestock predation by large carnivores**

2

3 Ann Eklund\*<sup>1</sup>, José Vicente López-Bao<sup>2</sup>, Mahdiah Tourani<sup>1,3</sup>, Guillaume Chapron<sup>1</sup>, Jens Frank<sup>1</sup>

4 <sup>1</sup> Grimsö Wildlife Research Station, Department of Ecology, Swedish University of Agricultural Sciences, SE-730 91, Riddarhyttan, Sweden

5 <sup>2</sup> Research Unit of Biodiversity (UO/CSIC/PA), Oviedo University, Gonzalo Gutiérrez Quirós s/n, 33600, Mieres, Spain

6 <sup>3</sup> Faculty of Environmental Sciences and Natural Resource Management, Norwegian University of Life Sciences, P.O. Box 5003, 1432 Ås, Norway

7 Corresponding author:

8 Ann Eklund, phone: +46 (0)581 69 73 40, email: ann.eklund@slu.se

9

10 Table S1. Distribution of all studies identified as applying a quasi-experimental or experimental design, among intervention groups.

| Intervention group | Study                             | Intervention type                       | Carnivore species                                                                    | Livestock              | Sample size                                   | Duration of study |
|--------------------|-----------------------------------|-----------------------------------------|--------------------------------------------------------------------------------------|------------------------|-----------------------------------------------|-------------------|
| Change livestock   | Landa et al. <sup>26</sup>        | Replace Dala sheep breed (70-80 kg)     | Wolverine ( <i>Gulo gulo</i> )                                                       |                        | One area,<br>3877 control (Dala) lambs        | 3 years           |
|                    |                                   | with                                    |                                                                                      |                        |                                               |                   |
|                    |                                   | a) Norwegian short tail breed (65-70kg) |                                                                                      | a) Lambs               | a) 2986 treatment lambs                       |                   |
|                    |                                   | b) Norwegian fur bearing breed (60 kg)  |                                                                                      | b) Lambs               | b) 681 treatment lambs                        |                   |
|                    |                                   | c) Rygja breed (75-80 kg)               | c) Lambs                                                                             | c) 428 treatment lambs |                                               |                   |
| Enclosure          | Bauer et al. <sup>35</sup>        | Improved enclosures (clay construction) | Lion ( <i>Panthera leo</i> ) and spotted hyena ( <i>Crocuta crocuta</i> )            | Cattle and shoats      | 2 areas with treatment and control enclosures | 2 years           |
|                    |                                   |                                         |                                                                                      |                        |                                               |                   |
|                    | Kolowski & Holekamp <sup>28</sup> | Use of pole boma vs. bush boma          | a) Spotted hyena ( <i>Crocuta crocuta</i> )<br>b) Leopard ( <i>Panthera pardus</i> ) | Sheep and goats        | 40 treatment boma<br>44 control boma          | 14 months         |

|                                     |                                                             |                                                                                                                         |                                                    |                                               |                                  |
|-------------------------------------|-------------------------------------------------------------|-------------------------------------------------------------------------------------------------------------------------|----------------------------------------------------|-----------------------------------------------|----------------------------------|
| Lichtenfeld<br>et al. <sup>34</sup> | Fortified boma (living wall)                                | Lion ( <i>Panthera leo</i> )                                                                                            | Livestock                                          | 62 treatment boma<br>84 control boma          | 9296 boma<br>months/<br>10 years |
| Mazzolli et al. <sup>33</sup>       | Night corrals                                               | Mountain lion<br>( <i>Puma concolor</i> )                                                                               | Sheep and swine                                    | 5 treatment farms<br>19 control farms         | 3 years                          |
| Rigg et al. <sup>32</sup>           | Night barn (always or sometimes) with<br>pasture as control | a) Brown bear ( <i>Ursus arctos</i> )<br>b) Wolf ( <i>Canis lupus</i> )                                                 | Sheep                                              | 52 treatment farms<br>106 control farms       | 3 years                          |
| Woodroffe<br>et al. <sup>23</sup>   | Transparency of boma wall                                   | a) Lion ( <i>Panthera leo</i> ),<br>leopard ( <i>Panthera pardus</i> ),<br>and spotted hyena ( <i>Crocuta crocuta</i> ) | a) Cattle, sheep,<br>goats, camels, and<br>donkeys | a) 178 matched bomas<br>(treatment + control) | 4.5 years                        |

|          |                                 |                                                                         |                                                                                                                                                      |                                                           |                                                                                         |           |
|----------|---------------------------------|-------------------------------------------------------------------------|------------------------------------------------------------------------------------------------------------------------------------------------------|-----------------------------------------------------------|-----------------------------------------------------------------------------------------|-----------|
|          |                                 |                                                                         | b) Spotted hyena ( <i>Crocuta crocuta</i> )                                                                                                          | b) Sheep and goats                                        | b) 95 matched bomas (treatment + control)                                               |           |
| Guarding | Iliopoulos et al. <sup>36</sup> | Herders vs. non-predator proof fence (damage claims for attacked herds) | Wolf ( <i>Canis lupus</i> )                                                                                                                          | Sheep and goats                                           | 181 treatment<br>7 control                                                              | 21 months |
|          | Palmer et al. <sup>24</sup>     | Herders                                                                 | Coyote ( <i>Canis latrans</i> ), cougar ( <i>Puma concolor</i> ), and black bear ( <i>Ursus americanus</i> )                                         | Lambs                                                     | 5 treatment herds<br>4 control herds<br>(5 herds, 1-2 years)                            | 4 months  |
|          | Woodroffe et al. <sup>23</sup>  | Number of men                                                           | a) Lion ( <i>Panthera leo</i> ), leopard ( <i>Panthera pardus</i> ), and spotted hyena ( <i>Crocuta crocuta</i> )<br>b) Lion ( <i>Panthera leo</i> ) | a) Cattle, sheep, goats, camels, and donkeys<br>b) Cattle | a) 178 matched bomas (treatment + control)<br>b) 31 matched bomas (treatment + control) | 4.5 years |

|                        |                              |                                                                               |                                                                                                                    |           |                                                             |          |
|------------------------|------------------------------|-------------------------------------------------------------------------------|--------------------------------------------------------------------------------------------------------------------|-----------|-------------------------------------------------------------|----------|
| Livestock guarding dog | Andelt <sup>25</sup>         | Livestock guarding dog in<br>a) fenced pastures<br><br>b) open range pastures | Coyote ( <i>Canis latrans</i> )                                                                                    | a1) Lambs | a1) 6 treatment, 73 control                                 | 1 year   |
|                        |                              |                                                                               |                                                                                                                    | a2) Ewes  | a2) 7 treatment, 78 control                                 |          |
|                        |                              |                                                                               |                                                                                                                    | b1) Lambs | b1) 10 treatment, 20 control                                |          |
|                        |                              |                                                                               |                                                                                                                    | b2) Ewes  | b2) 10 treatment, 20 control                                |          |
|                        | Gehring et al. <sup>13</sup> | Livestock guarding dog                                                        | Coyote ( <i>Canis latrans</i> )                                                                                    | Cattle    | 6 treatment farms,<br>3 control farms                       | 3 years  |
|                        | Palmer et al. <sup>24</sup>  | Livestock guarding dog                                                        | Coyote ( <i>Canis latrans</i> ),<br>cougar ( <i>Puma concolor</i> ), and<br>black bear ( <i>Ursus americanus</i> ) | Lambs     | 1 treatment herd<br>8 control herds<br>(5 herds, 1-2 years) | 4 months |
|                        | Rigg et al. <sup>32</sup>    | Livestock guarding dog                                                        | Wolf ( <i>Canis lupus</i> ) and<br>brown bear ( <i>Ursus arctos</i> )                                              | Sheep     | 14 treatment flocks<br>45 control flocks                    | 4 years  |

|                  |                                |                                                                                                                                                                                                                                                           |                                                                                                                |                                           |                                                                          |           |
|------------------|--------------------------------|-----------------------------------------------------------------------------------------------------------------------------------------------------------------------------------------------------------------------------------------------------------|----------------------------------------------------------------------------------------------------------------|-------------------------------------------|--------------------------------------------------------------------------|-----------|
|                  | Woodroffe et al. <sup>23</sup> | Domestic dog present in boma                                                                                                                                                                                                                              | Lion ( <i>Panthera leo</i> ), leopard ( <i>Panthera pardus</i> ), and spotted hyena ( <i>Crocuta crocuta</i> ) | Cattle, sheep, goats, camels, and donkeys | 178 matched bomas (treatment + control)                                  | 4.5 years |
| Predator removal | Bradley et al. <sup>39</sup>   | Trapping and euthanizing, ground shooting, aerial gunning, translocation in response to attack. Partial- or full pack removal (with time after first attack).<br>a) partial <7 days<br>b) partial <14 days<br>c) partial >14 days<br>d) full pack removal | Wolf ( <i>Canis lupus</i> )                                                                                    | Sheep, cattle, and other                  | 326 partial removal<br>48 full pack removal<br>593 control               | 1850 days |
|                  | Blejwas et al. <sup>27</sup>   | Removal of breeding pair (toxin or shooting)                                                                                                                                                                                                              | Coyote ( <i>Canis latrans</i> )                                                                                | a) Lambs<br>b) Ewes                       | a) 14 territories (after + before)<br>b) 20 territories (after + before) | 2.8 years |

|                               |                                         |                                                            |                                                                      |                           |                                             |            |
|-------------------------------|-----------------------------------------|------------------------------------------------------------|----------------------------------------------------------------------|---------------------------|---------------------------------------------|------------|
|                               | Harper et al. <sup>37</sup>             | a) Trapping of any individual<br>b) Trapping of adult male | Wolf ( <i>Canis lupus</i> )                                          | Cattle, turkey, and sheep | 923 verified depredations                   | 20 years   |
|                               | Wagner & Conover <sup>38</sup>          | Aerial hunting before grazing season                       | Coyote ( <i>Canis latrans</i> )                                      | Lambs                     | 21 paired pastures<br>(treatment + control) | 3-6 months |
| Shock collar                  | Hawley et al. <sup>40</sup>             | Shock collar                                               | Wolf ( <i>Canis lupus</i> )                                          | Bait                      | 5 treatment wolves<br>5 control wolves      | 28 days    |
| Sterilization                 | Bromley & Gese <sup>41</sup>            | Sterilization of carnivore                                 | Coyote ( <i>Canis latrans</i> )                                      | Lambs                     | 4 treatment packs<br>8 control packs (1999) | 5-23 days  |
| Visual/<br>Auditory deterrent | Davidson-Nelson & Gehring <sup>29</sup> | Fladry                                                     | a) Wolf ( <i>Canis lupus</i> )<br>b) Coyote ( <i>Canis latrans</i> ) | Sheep and cattle          | 4 treatment farms<br>4 control farms        | 75 days    |

---

|                                   |                      |                                                                                                                                                                              |                                                                              |                                                                                                   |                                               |
|-----------------------------------|----------------------|------------------------------------------------------------------------------------------------------------------------------------------------------------------------------|------------------------------------------------------------------------------|---------------------------------------------------------------------------------------------------|-----------------------------------------------|
| Lance et al. <sup>14</sup>        | Electrical fladry    | Wolf ( <i>Canis lupus</i> )                                                                                                                                                  | Cattle                                                                       | 6 treatment pastures<br>6 control pastures                                                        | Treatment:<br>20 days,<br>control:<br>29 days |
| Musiani et al. <sup>42</sup>      | Fladry               | Wolf ( <i>Canis lupus</i> )                                                                                                                                                  | Cattle and bait                                                              | 2 pastures<br>(treatment + before)                                                                | 60 days                                       |
| Woodroffe<br>et al. <sup>23</sup> | Number of scarecrows | a) Lion ( <i>Panthera leo</i> ),<br>leopard ( <i>Panthera pardus</i> ),<br>and spotted hyena ( <i>Crocuta<br/>crocuta</i> )<br><br>b) Leopard ( <i>Panthera<br/>pardus</i> ) | a) Cattle, sheep,<br>goats, camels, and<br>donkeys<br><br>b) Sheep and goats | a) 178 matched bomas<br>(treatment + control)<br><br>b) 35 matched bomas<br>(treatment + control) | 4.5 years                                     |

---



---

|                                                  |                                |                                                                       |                       |                                     |          |
|--------------------------------------------------|--------------------------------|-----------------------------------------------------------------------|-----------------------|-------------------------------------|----------|
| Zarco-González &<br>Monroy-Vilchis <sup>15</sup> | Auditory and visual deterrents | Puma ( <i>Puma concolor</i> ), and<br>jaguar ( <i>Panthera onca</i> ) | a) Cattle<br>b) Goats | 2 treatment farms<br>1 control farm | 2 months |
|--------------------------------------------------|--------------------------------|-----------------------------------------------------------------------|-----------------------|-------------------------------------|----------|

---
